# Supplementary material for: Computational discovery of diverse functionalities in two-dimensional square disulfide monolayers: auxetic behavior, high curie temperature ferromagnets, electrocatalysts, and photocatalysts
Source: Royal Society of Chemistry journal article supplement (doi:10.1039/d3ta03699e), 2023-01-01
Supplement: d3ta03699e1.pdf [file d3ta03699e1.pdf]

## Supplementary Material

### **Computational Discovery of Diverse Functionalities in Two-Dimensional Square Disulfide Monolayers: Auxetic Behavior, High Curie Temperature Ferromagnets, Electrocatalysts, and Photocatalysts**

Yu Liu<sup>1</sup>, Wenlong Li<sup>1</sup>, Fengyu Li<sup>1,\*</sup>, Zhongfang Chen<sup>2,\*</sup>

<sup>1</sup> *School of Physical Science and Technology, Inner Mongolia University, Hohhot, 010021, China*

<sup>2</sup> *Department of Chemistry, The Institute for Functional Nanomaterials, University of Puerto Rico, Rio Piedras Campus, San Juan, PR 00931, USA*

\* Corresponding Authors: [fengyuli@imu.edu.cn](mailto:fengyuli@imu.edu.cn) (FL); [zhongfang.chen1@upr.edu](mailto:zhongfang.chen1@upr.edu) (ZC)

**Table S1.** The structural parameters and cohesive energies of 68  $S$ - $XS_2$  monolayers (the italics are the data of the corresponding hexagonal structure, and the bolds in  $E_{coh}$  are the values of square structure larger than the corresponding hexagonal structure), where ‘\*’ indicates the cases where the optimized structures are not square.

| $S$ - $XS_2$                          | $a = b$ (Å)      | $h$ (Å)     | $\theta$ (°)  | $r_{X-S}$ (Å)    | $E_{coh}$ (eV/atom) |
|---------------------------------------|------------------|-------------|---------------|------------------|---------------------|
| $S$ -HS <sub>2</sub>                  | 2.50             | 2.98        | 79.82         | 1.94             | 2.29                |
|                                       | --               | --          | --            | --               | --                  |
| $S$ -LiS <sub>2</sub>                 | 2.60             | 4.00        | 65.91         | 2.38             | <b>2.90</b>         |
|                                       | <i>2.57/2.86</i> | <i>3.92</i> | <i>102.16</i> | <i>2.52</i>      | <i>2.74</i>         |
| $S$ -NaS <sub>2</sub>                 | 2.70             | 4.66        | 60.03         | 2.69             | <b>2.39</b>         |
|                                       | <i>2.88</i>      | <i>4.50</i> | <i>107.17</i> | <i>2.80</i>      | <i>2.24</i>         |
| $S$ -KS <sub>2</sub>                  | 2.81             | 5.28        | 56.01         | 2.99             | 2.04                |
|                                       | <i>2.51/4.77</i> | <i>3.69</i> | <i>72.65</i>  | <i>3.12</i>      | <i>2.23</i>         |
| $S$ -RbS <sub>2</sub>                 | 2.94             | 5.54        | 55.97         | 3.13             | <b>1.83</b>         |
|                                       | --               | --          | --            | --               | --                  |
| $S$ -CsS <sub>2</sub>                 | 5.00             | 4.19        | 100.12        | 3.26             | 1.22                |
|                                       | <i>5.37</i>      | <i>2.02</i> | <i>36.05</i>  | <i>3.26</i>      | <i>2.60</i>         |
| $S$ -BeS <sub>2</sub>                 | 2.81             | 3.07        | 84.94         | 2.08             | <b>3.58</b>         |
|                                       | <i>2.97</i>      | <i>2.94</i> | <i>81.10</i>  | <i>2.25</i>      | <i>3.22</i>         |
| $S$ -MgS <sub>2</sub>                 | 3.05             | 3.78        | 77.67         | 2.43             | <b>2.84</b>         |
|                                       | <i>3.14</i>      | <i>3.64</i> | <i>90.19</i>  | <i>2.57</i>      | <i>2.80</i>         |
| $S$ -CaS <sub>2</sub>                 | 3.32             | 4.21        | 76.54         | 2.68             | 2.96                |
|                                       | <i>3.44</i>      | <i>3.97</i> | <i>89.96</i>  | <i>2.81</i>      | <i>3.10</i>         |
| $S$ -SrS <sub>2</sub>                 | 3.59             | 4.39        | 78.52         | 2.84             | 2.69                |
|                                       | <i>4.76</i>      | <i>2.15</i> | <i>42.79</i>  | <i>2.95</i>      | <i>3.91</i>         |
| $S$ -BaS <sub>2</sub>                 | 4.13             | 4.19        | 89.19         | 2.94             | 2.65                |
|                                       | <i>4.99</i>      | <i>2.15</i> | <i>40.90</i>  | <i>3.07</i>      | <i>3.94</i>         |
| $S$ -BS <sub>2</sub>                  | 2.96             | 2.42        | 101.52        | 1.91             | <b>4.59</b>         |
|                                       | <i>4.17/2.96</i> | <i>3.20</i> | <i>64.41</i>  | <i>1.91/3.52</i> | <i>4.59</i>         |
| $S$ -AlS <sub>2</sub>                 | 3.40             | 2.97        | 97.71         | 2.26             | <b>3.94</b>         |
|                                       | <i>3.45</i>      | <i>2.76</i> | <i>69.41</i>  | <i>2.43</i>      | <i>3.74</i>         |
| $S$ -GaS <sub>2</sub>                 | 3.43             | 3.00        | 97.50         | 2.28             | <b>3.35</b>         |
|                                       | <i>3.46</i>      | <i>2.91</i> | <i>72.03</i>  | <i>2.47</i>      | <i>3.04</i>         |
| $S$ -InS <sub>2</sub>                 | 3.66             | 3.31        | 95.70         | 2.47             | <b>3.01</b>         |
|                                       | <i>3.81</i>      | <i>2.94</i> | <i>67.48</i>  | <i>2.64</i>      | <i>2.93</i>         |
| $S$ -TlS <sub>2</sub>                 | 3.76             | 3.40        | 95.72         | 2.54             | <b>2.50</b>         |
|                                       | <i>3.91</i>      | <i>3.04</i> | <i>67.94</i>  | <i>2.72</i>      | <i>2.36</i>         |
| $S$ -CS <sub>2</sub>                  | 2.97             | 2.30        | 104.53        | 1.88             | 4.03                |
|                                       | --               | --          | --            | --               | --                  |
| <b><math>S</math>-SiS<sub>2</sub></b> | 3.38             | 2.70        | 102.67        | 2.16             | <b>4.27</b>         |
|                                       | <i>3.24</i>      | <i>2.91</i> | <i>75.80</i>  | <i>2.37</i>      | <i>3.77</i>         |
| <b><math>S</math>-GeS<sub>2</sub></b> | 3.51             | 2.85        | 101.90        | 2.26             | <b>3.68</b>         |
|                                       | <i>3.38</i>      | <i>3.07</i> | <i>76.38</i>  | <i>2.48</i>      | <i>3.24</i>         |
| <b><math>S</math>-SnS<sub>2</sub></b> | 3.78             | 3.08        | 101.77        | 2.44             | <b>3.51</b>         |
|                                       | <i>3.61</i>      | <i>3.26</i> | <i>76.12</i>  | <i>2.64</i>      | <i>2.71</i>         |
| <b><math>S</math>-PbS<sub>2</sub></b> | 3.94             | 3.20        | 101.77        | 2.54             | <b>3.05</b>         |
|                                       | <i>3.76</i>      | <i>3.36</i> | <i>75.47</i>  | <i>2.75</i>      | <i>2.87</i>         |

|                                 |           |      |        |      |             |
|---------------------------------|-----------|------|--------|------|-------------|
| <i>S</i> -NS <sub>2</sub>       | 2.73      | 2.82 | 88.06  | 1.96 | 2.62        |
|                                 | --        | --   | --     | --   | --          |
| * <i>S</i> -PS <sub>2</sub>     | 3.57/3.63 | 2.39 | 111.28 | 2.16 | <b>3.23</b> |
|                                 | 3.16      | 3.12 | 81.06  | 2.40 | 2.94        |
| <i>S</i> -AsS <sub>2</sub>      | 3.82      | 2.60 | 111.57 | 2.31 | <b>2.97</b> |
|                                 | 3.33      | 3.33 | 81.66  | 2.54 | 2.80        |
| <i>S</i> -SbS <sub>2</sub>      | 4.11      | 2.80 | 111.60 | 2.49 | <b>2.97</b> |
|                                 | 3.61      | 3.41 | 78.63  | 2.69 | 2.91        |
| <i>S</i> -BiS <sub>2</sub>      | 4.20      | 3.04 | 108.26 | 2.59 | <b>2.83</b> |
|                                 | 3.77      | 3.50 | 77.53  | 2.79 | 2.81        |
| * <i>S</i> -OS <sub>2</sub>     | --        | --   | --     | --   | --          |
| <i>S</i> -SeS <sub>2</sub>      | 3.87      | 2.78 | 108.58 | 2.38 | 2.46        |
|                                 | 3.45      | 3.28 | 78.98  | 2.58 | 2.48        |
| <i>S</i> -TeS <sub>2</sub>      | 4.37      | 2.45 | 121.50 | 2.50 | 2.63        |
|                                 | 3.71      | 3.39 | 76.79  | 2.73 | 2.65        |
| <i>S</i> -PoS <sub>2</sub>      | 4.12      | 3.29 | 102.85 | 2.64 | 2.68        |
|                                 | 3.83      | 3.43 | 75.60  | 2.80 | 2.78        |
| * <i>S</i> -FS <sub>2</sub>     | --        | --   | --     | --   | --          |
| <i>S</i> -ClS <sub>2</sub>      | 4.50      | 1.03 | 154.17 | 2.31 | 1.49        |
|                                 | --        | --   | --     | --   | --          |
| <i>S</i> -BrS <sub>2</sub>      | 4.53      | 1.70 | 138.77 | 2.42 | 1.51        |
|                                 | --        | --   | --     | --   | --          |
| <i>S</i> -IS <sub>2</sub>       | 4.68      | 1.98 | 134.05 | 2.54 | <b>1.74</b> |
|                                 | 3.70      | 3.60 | 80.13  | 2.80 | 1.52        |
| * <i>S</i> -HeS <sub>2</sub>    | 2.31/2.46 | 7.64 | 35.67  | 4.01 | 0.61        |
| * <i>S</i> -NeS <sub>2</sub>    | 2.49/2.33 | 7.77 | 32.81  | 4.13 | 1.78        |
| * <i>S</i> -ArS <sub>2</sub>    | 2.69/2.55 | 8.32 | 34.06  | 4.35 | 1.27        |
| * <i>S</i> -KrS <sub>2</sub>    | 2.69/2.86 | 8.14 | 38.78  | 4.30 | 0.90        |
| * <i>S</i> -XeS <sub>2</sub>    | --        | --   | --     | --   | --          |
| <i>S</i> -ScS <sub>2</sub>      | 3.68      | 3.22 | 97.62  | 2.44 | 4.44        |
|                                 | 3.79      | 2.72 | 63.68  | 2.58 | 4.69        |
| <b><i>S</i>-TiS<sub>2</sub></b> | 3.68      | 2.71 | 107.15 | 2.29 | 5.00        |
|                                 | 3.35      | 3.02 | 75.97  | 2.45 | 5.10        |
| <b><i>S</i>-VS<sub>2</sub></b>  | 3.53      | 2.64 | 107.72 | 2.21 | 4.53        |
|                                 | 3.17      | 2.97 | 78.07  | 2.36 | 4.82        |
| <b><i>S</i>-CrS<sub>2</sub></b> | 3.50      | 2.48 | 109.38 | 2.15 | 3.78        |
|                                 | 3.04      | 2.94 | 79.82  | 2.29 | 4.17        |
| <b><i>S</i>-MnS<sub>2</sub></b> | 3.44      | 2.44 | 109.44 | 2.11 | 3.65        |
|                                 | 3.11      | 2.77 | 75.37  | 2.27 | 3.84        |
| <i>S</i> -FeS <sub>2</sub>      | 3.46      | 2.33 | 112.15 | 2.08 | 3.89        |
|                                 | 3.15      | 2.66 | 72.35  | 2.25 | 3.99        |
| <i>S</i> -CoS <sub>2</sub>      | 3.52      | 2.23 | 115.29 | 2.08 | 3.86        |
|                                 | 3.23      | 2.51 | 67.73  | 2.25 | 3.98        |
| <i>S</i> -NiS <sub>2</sub>      | 3.67      | 2.05 | 121.57 | 2.10 | 3.71        |
|                                 | 3.55      | 2.11 | 54.42  | 2.30 | 3.93        |
| <i>S</i> -CuS <sub>2</sub>      | 2.66      | 3.82 | 69.79  | 2.33 | 3.08        |
|                                 | 3.72      | 2.14 | 52.95  | 2.40 | 3.13        |
| * <i>S</i> -ZnS <sub>2</sub>    | 2.55/3.72 | 3.44 | 105.19 | 2.34 | 2.55        |

---

|                                 |                   |              |                 |                   |                     |
|---------------------------------|-------------------|--------------|-----------------|-------------------|---------------------|
| <i>S</i> -YS <sub>2</sub>       | 3.94<br>4.07      | 3.44<br>2.82 | 98.55<br>61.93  | 2.60<br>2.74      | 4.44<br>4.82        |
| <b><i>S</i>-ZrS<sub>2</sub></b> | 3.93<br>3.58      | 2.87<br>3.15 | 107.67<br>74.59 | 2.43<br>2.60      | 5.45<br>5.57        |
| <i>S</i> -NbS <sub>2</sub>      | 3.72<br>3.35      | 2.81<br>3.12 | 105.87<br>77.88 | 2.33<br>2.48      | 5.39<br>5.80        |
| <b><i>S</i>-MoS<sub>2</sub></b> | 3.71<br>3.18      | 2.61<br>3.13 | 109.73<br>80.78 | 2.27<br>2.41      | 4.51<br>5.41        |
| <i>S</i> -TcS <sub>2</sub>      | 3.58<br>3.29      | 2.65<br>2.90 | 106.98<br>74.66 | 2.23<br>2.39      | 4.65<br>4.90        |
| <i>S</i> -RuS <sub>2</sub>      | 3.63<br>3.34      | 2.51<br>2.80 | 110.63<br>71.98 | 2.21<br>2.38      | 4.57<br>4.65        |
| <i>S</i> -RhS <sub>2</sub>      | 3.67<br>3.34      | 2.46<br>2.86 | 112.27<br>72.82 | 2.21<br>2.32      | 4.08<br>4.16        |
| <i>S</i> -PdS <sub>2</sub>      | 2.70<br>3.92      | 4.16<br>2.07 | 65.91<br>49.07  | 2.48<br>2.48      | 3.03<br>3.32        |
| <i>S</i> -AgS <sub>2</sub>      | 2.71<br>3.41      | 4.53<br>3.22 | 61.73<br>78.70  | 2.64<br>2.54      | <b>2.53</b><br>2.31 |
| <i>S</i> -CdS <sub>2</sub>      | 3.09<br>5.12/4.29 | 4.06<br>2.16 | 74.60<br>39.74  | 2.55<br>3.37/2.47 | 2.09<br>2.49        |
| <i>S</i> -HfS <sub>2</sub>      | 3.82<br>3.54      | 2.91<br>3.13 | 105.41<br>74.93 | 2.40<br>2.57      | 5.52<br>5.66        |
| <i>S</i> -TaS <sub>2</sub>      | 3.69<br>3.34      | 2.83<br>3.13 | 105.05<br>78.04 | 2.33<br>2.48      | 5.46<br>5.91        |
| <i>S</i> -WS <sub>2</sub>       | 3.53<br>3.19      | 2.88<br>3.14 | 101.51<br>80.93 | 2.28<br>2.42      | 5.20<br>5.91        |
| <b><i>S</i>-ReS<sub>2</sub></b> | 3.63<br>3.32      | 2.61<br>2.88 | 108.63<br>73.77 | 2.24<br>2.40      | 4.76<br>4.85        |
| <b><i>S</i>-OsS<sub>2</sub></b> | 3.67<br>3.38      | 2.47<br>2.77 | 112.03<br>70.88 | 2.21<br>3.39      | 4.84<br>5.01        |
| <i>S</i> -IrS <sub>2</sub>      | 3.77<br>3.36      | 2.34<br>2.88 | 116.41<br>72.83 | 2.22<br>2.32      | <b>4.53</b><br>4.43 |
| <i>S</i> -PtS <sub>2</sub>      | 3.54<br>3.48      | 2.84<br>2.79 | 102.52<br>69.64 | 2.27<br>2.45      | 3.72<br>3.75        |
| <i>S</i> -AuS <sub>2</sub>      | 3.38<br>4.70/3.41 | 3.34<br>3.23 | 90.73<br>46.72  | 2.37<br>4.08/4.07 | 2.46<br>2.86        |
| * <i>S</i> -HgS <sub>2</sub>    | 4.05/2.71         | 3.91         | 61.11           | 2.67              | 1.68                |

---

**Table S2.** The elastic constants (in  $\text{Nm}^{-1}$ ), Young's modulus ( $Y$ , in  $\text{Nm}^{-1}$ ) and Poisson's ratio ( $\nu$ ) of the 37 thermodynamically and dynamically stable  $S\text{-XS}_2$  structures, including 27 mechanically stable monolayers and 10 mechanically unstable monolayers. Negative Poisson's ratios are indicated in bold within the data, while relevant data for two  $\text{SiS}_2$  structures obtained by the CALYPSO code are represented in italics.

|                                           | $C_{11}$      | $C_{22}$      | $C_{12}$     | $C_{66}$     | $Y_x$         | $Y_y$         | $\nu_x$       | $\nu_y$       |
|-------------------------------------------|---------------|---------------|--------------|--------------|---------------|---------------|---------------|---------------|
| $S\text{-BS}_2$                           | 102.62        | 102.62        | 27.83        | 20.47        | 95.08         | 95.08         | 0.271         | 0.271         |
| $S\text{-AlS}_2$                          | 47.97         | 47.97         | 2.91         | 4.77         | 47.79         | 47.79         | 0.061         | 0.061         |
| $S\text{-GaS}_2$                          | 45.58         | 45.58         | 4.24         | 6.69         | 45.19         | 45.19         | 0.093         | 0.093         |
| $S\text{-InS}_2$                          | 33.21         | 33.21         | 3.47         | 2.70         | 32.85         | 32.85         | 0.104         | 0.104         |
| $S\text{-TlS}_2$                          | 24.02         | 24.02         | 2.93         | 3.34         | 23.85         | 23.85         | 0.121         | 0.121         |
| $S\text{-SiS}_2$                          | 96.37         | 96.37         | -5.18        | 2.13         | 96.09         | 96.09         | <b>-0.054</b> | <b>-0.054</b> |
| <i><math>\text{SiS}_2\text{-2}</math></i> | <i>97.11</i>  | <i>91.33</i>  | <i>-2.76</i> | <i>7.04</i>  | <i>81.41</i>  | <i>76.57</i>  | <b>-0.030</b> | <b>-0.028</b> |
| <i><math>\text{SiS}_2\text{-3}</math></i> | <i>115.12</i> | <i>115.12</i> | <i>24.97</i> | <i>45.07</i> | <i>109.70</i> | <i>109.70</i> | <i>0.217</i>  | <i>0.217</i>  |
| $S\text{-GeS}_2$                          | 75.55         | 75.55         | -4.73        | 1.72         | 75.26         | 75.26         | <b>-0.063</b> | <b>-0.063</b> |
| $S\text{-SnS}_2$                          | 51.39         | 51.39         | -4.27        | 0.98         | 51.04         | 51.04         | <b>-0.083</b> | <b>-0.083</b> |
| $S\text{-PbS}_2$                          | 39.49         | 39.49         | -2.45        | 0.09         | 39.34         | 39.34         | <b>-0.062</b> | <b>-0.062</b> |
| $S\text{-TiS}_2$                          | 31.38         | 31.38         | 0.51         | 5.05         | 31.37         | 31.37         | 0.016         | 0.016         |
| $S\text{-VS}_2$                           | 28.55         | 28.55         | 3.38         | 7.49         | 28.15         | 28.15         | 0.118         | 0.118         |
| $S\text{-CrS}_2$                          | 40.30         | 40.30         | 10.91        | 11.31        | 37.35         | 37.35         | 0.271         | 0.271         |
| $S\text{-MnS}_2$                          | 42.33         | 42.33         | 10.85        | 10.85        | 39.55         | 39.55         | 0.256         | 0.256         |
| $S\text{-FeS}_2$                          | 12.65         | 12.65         | -7.20        | 6.52         | 8.55          | 8.55          | <b>-0.569</b> | <b>-0.569</b> |
| $S\text{-CoS}_2$                          | 20.67         | 20.67         | 11.32        | 3.69         | 14.47         | 14.47         | 0.548         | 0.548         |
| $S\text{-ZrS}_2$                          | 29.70         | 29.70         | 0.44         | 1.78         | 29.69         | 29.69         | 0.015         | 0.015         |
| $S\text{-NbS}_2$                          | 22.19         | 22.19         | 15.42        | 7.03         | 11.48         | 11.48         | 0.695         | 0.695         |
| $S\text{-MoS}_2$                          | 44.10         | 44.10         | 12.71        | 8.54         | 40.44         | 40.44         | 0.288         | 0.288         |
| $S\text{-RuS}_2$                          | 39.25         | 39.25         | 15.13        | 2.45         | 33.41         | 33.41         | 0.385         | 0.385         |
| $S\text{-RhS}_2$                          | 13.98         | 13.98         | -6.20        | 3.90         | 11.23         | 11.23         | <b>-0.443</b> | <b>-0.443</b> |
| $S\text{-AgS}_2$                          | 145.48        | 145.48        | -11.17       | 0.31         | 144.62        | 144.62        | <b>-0.077</b> | <b>-0.077</b> |
| $S\text{-HfS}_2$                          | 37.67         | 37.67         | 3.75         | 1.57         | 37.30         | 37.30         | 0.100         | 0.100         |
| $S\text{-TaS}_2$                          | 27.43         | 27.43         | 20.19        | 8.59         | 12.57         | 12.57         | 0.736         | 0.736         |
| $S\text{-WS}_2$                           | 22.66         | 22.66         | 19.85        | 13.86        | 5.27          | 5.27          | 0.876         | 0.876         |
| $S\text{-ReS}_2$                          | 29.96         | 29.96         | 11.82        | 9.71         | 25.30         | 25.30         | 0.395         | 0.395         |
| $S\text{-OsS}_2$                          | 37.47         | 37.47         | 15.20        | 2.66         | 31.30         | 31.30         | 0.406         | 0.406         |
| $S\text{-IrS}_2$                          | 34.27         | 34.27         | 6.90         | 3.57         | 32.88         | 32.88         | 0.201         | 0.201         |
| <b><i>Mechanically unstable</i></b>       |               |               |              |              |               |               |               |               |
| $S\text{-BeS}_2$                          | 52.22         | 52.22         | 53.49        | 8.99         | --            | --            | --            | --            |
| $S\text{-AsS}_2$                          | -131.99       | -131.99       | 189.29       | 2.51         | --            | --            | --            | --            |
| $S\text{-SbS}_2$                          | -43.02        | -43.02        | 82.43        | 1.36         | --            | --            | --            | --            |
| $S\text{-BiS}_2$                          | 8.07          | 8.07          | 25.83        | 0.63         | --            | --            | --            | --            |
| $S\text{-NiS}_2$                          | -19.25        | -19.25        | -45.40       | 6.65         | --            | --            | --            | --            |
| $S\text{-CuS}_2$                          | -29.58        | -29.58        | -3.50        | 4.63         | --            | --            | --            | --            |
| $S\text{-TeS}_2$                          | 15.42         | 15.42         | 15.83        | 9.42         | --            | --            | --            | --            |
| $S\text{-CdS}_2$                          | -4.37         | -4.37         | 53.28        | 4.26         | --            | --            | --            | --            |
| $S\text{-PtS}_2$                          | -34.02        | -34.02        | -25.91       | -3.46        | --            | --            | --            | --            |
| $S\text{-AuS}_2$                          | 22.16         | 22.16         | 12.80        | -1.54        | --            | --            | --            | --            |

$$C_{11} = C_{22}.$$

$$\text{Young's moduli } Y_x = Y_y = (C_{11}C_{22} - C_{12}C_{21})/C_{11}$$

$$\text{Poisson's ratio } \nu_x = \nu_y = C_{12}/C_{11}$$

**Table S3.** Possible stable structures predicted by CALYPSO code arranged in descending order based on cohesive energy ( $E_{coh}$ ).

| number | $E_{coh}$<br>(eV/atom) | space group | top-view                                                                            | side-view                                                                            |
|--------|------------------------|-------------|-------------------------------------------------------------------------------------|--------------------------------------------------------------------------------------|
| 1      | 4.27                   | $P-4m2$     | 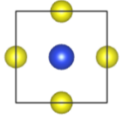  |   |
| 2      | 4.26                   | $C222$      |   |   |
| 3      | 4.24                   | $P-3m1$     |   |   |
| 4      | 4.17                   | $C2$        |  |  |

**Table S4.** Bader and Hirshfeld (in *italic*) charge analysis of  $S$ - $XS_2$  ( $X = \text{Si, Ge, Sn, Pb, Ti, V, Cr, Mn, Zr, Mo, Re, Os}$ ) monolayers (in  $|e|$ ).

| $S$ - $XS_2$         | $X$         | $S$         | $S$ - $XS_2$         | $X$         | $S$         |
|----------------------|-------------|-------------|----------------------|-------------|-------------|
| $S$ - $\text{SiS}_2$ | +2.31/+0.26 | -1.15/-0.13 | $S$ - $\text{CrS}_2$ | +1.10/+0.28 | -0.55/-0.14 |
| $S$ - $\text{GeS}_2$ | +1.24/+0.28 | -0.62/-0.14 | $S$ - $\text{MnS}_2$ | +0.94/+0.02 | -0.47/-0.01 |
| $S$ - $\text{SnS}_2$ | +1.44/+0.41 | -0.72/-0.20 | $S$ - $\text{ZrS}_2$ | +1.97/+0.38 | -0.99/-0.19 |
| $S$ - $\text{PbS}_2$ | +1.04/+0.46 | -0.52/-0.23 | $S$ - $\text{MoS}_2$ | +1.14/+0.30 | -0.57/-0.15 |
| $S$ - $\text{TiS}_2$ | +1.69/+0.28 | -0.84/-0.14 | $S$ - $\text{ReS}_2$ | +0.91/+0.06 | -0.46/-0.03 |
| $S$ - $\text{VS}_2$  | +1.43/+0.17 | -0.72/-0.09 | $S$ - $\text{OsS}_2$ | +0.61/+0.04 | -0.31/-0.02 |

**Table S5.** Relative energies of antiferromagnetic (AFM) and ferromagnetic (FM) states relative to non-magnetic (NM) state in a  $2 \times 2 \times 1$  supercell of  $S$ - $XS_2$  ( $X = \text{Re, Os, Si, Ge, Sn, Pb, Zr, Ti, Mo, V, Cr, and Mn}$ ) monolayers. Bold highlighting indicates monolayers with the lowest energies. The primary cell lattice constants ( $a$ ) of the magnetic ground state of the  $S$ - $XS_2$  ( $X = \text{Mo, V, Cr, and Mn}$ ) monolayers.

|                       | $E_{AFM1} - E_{NM}$<br>(eV) | $E_{AFM2} - E_{NM}$<br>(eV) | $E_{FM} - E_{NM}$<br>(eV) | $a$ (Å) |
|-----------------------|-----------------------------|-----------------------------|---------------------------|---------|
| $S$ -ReS <sub>2</sub> | 0.00                        | 0.00                        | 0.00                      | --      |
| $S$ -OsS <sub>2</sub> | 0.00                        | 0.00                        | 0.00                      | --      |
| $S$ -SiS <sub>2</sub> | 0.00                        | 0.00                        | 0.00                      | --      |
| $S$ -GeS <sub>2</sub> | 0.00                        | 0.00                        | 0.00                      | --      |
| $S$ -SnS <sub>2</sub> | 0.00                        | 0.00                        | 0.00                      | --      |
| $S$ -PbS <sub>2</sub> | 0.00                        | 0.00                        | 0.00                      | --      |
| $S$ -ZrS <sub>2</sub> | 0.00                        | 0.00                        | 0.00                      | --      |
| $S$ -TiS <sub>2</sub> | 0.00                        | 0.00                        | 0.00                      | --      |
| $S$ -MoS <sub>2</sub> | <b>-0.91</b>                | 0.00                        | -0.04                     | 7.41    |
| $S$ -VS <sub>2</sub>  | -1.70                       | -1.54                       | <b>-1.96</b>              | 3.65    |
| $S$ -CrS <sub>2</sub> | -4.44                       | -3.61                       | <b>-5.43</b>              | 3.66    |
| $S$ -MnS <sub>2</sub> | -3.28                       | -2.88                       | <b>-3.79</b>              | 3.75    |

**Table S6.**  $\Delta G_{\text{H}^*}$  values (in eV) for H adsorption at different sites on the same side of  $S\text{-XS}_2$  ( $X = \text{Re}, \text{Os}, \text{Cr}, \text{and Mn}$ ) monolayers. Certain initial sites transform to more stable geometries after relaxation. Values closest to zero are highlighted in bold.

| $S\text{-XS}_2$  | S1    | S2 | S3   | S4 | S5          | S6 | S7    | S8           |
|------------------|-------|----|------|----|-------------|----|-------|--------------|
| $S\text{-ReS}_2$ | 0.72  | S1 | 0.78 | S5 | <b>0.17</b> | S7 | 0.95  | 0.95         |
| $S\text{-OsS}_2$ | 0.81  | S1 | 0.93 | S5 | <b>0.46</b> | S7 | 0.47  | 0.48         |
| $S\text{-CrS}_2$ | 0.15  | S1 | S1   | S8 | S8          | S8 | S8    | <b>-0.37</b> |
| $S\text{-MnS}_2$ | -0.11 | S1 | S1   | S8 | S8          | S7 | -0.12 | <b>-0.49</b> |

**Table S7.**  $\Delta G_{\text{H}^*}$  values (in eV) for H adsorption at various sites on the antiferromagnetic (AFM1)  $S\text{-MoS}_2$  monolayer. Certain initial sites transform to more stable geometries after relaxation. Values closest to zero are highlighted in bold.

| $S\text{-XS}_2$  | S1          | S2 | S3   | S4  | S5   | S6  |
|------------------|-------------|----|------|-----|------|-----|
| $S\text{-MoS}_2$ | S8          | S8 | 0.95 | S5  | 0.36 | S8  |
| S7               | S8          | S9 | S10  | S11 | S12  | S13 |
| S8               | <b>0.23</b> | S8 | 0.36 | S10 | 0.95 | S1  |

**Table S8.**  $\Delta G_{\text{H}^*}$  values (in eV) of the  $S\text{-XS}_2$  monolayers at various H coverage ( $\theta$ ) conditions. The data in brackets represent the  $\Delta G_{\text{H}^*}$  values of the corresponding magnetic ground state after H adsorption.

| H coverage ( $\theta$ ) | $S\text{-ReS}_2$ | $S\text{-OsS}_2$ | $S\text{-CrS}_2$ | $S\text{-MnS}_2$ | $S\text{-MoS}_2$ |
|-------------------------|------------------|------------------|------------------|------------------|------------------|
| 1/4                     | 0.17             | 0.46             | -0.37            | -0.49            | 0.23 (0.37)      |
| 1/9                     | -0.06            | 0.03             | -0.38            | -0.50            | --               |
| 1/16                    | -0.18            | -0.09            | -0.41            | -0.52            | 0.09 (0.32)      |



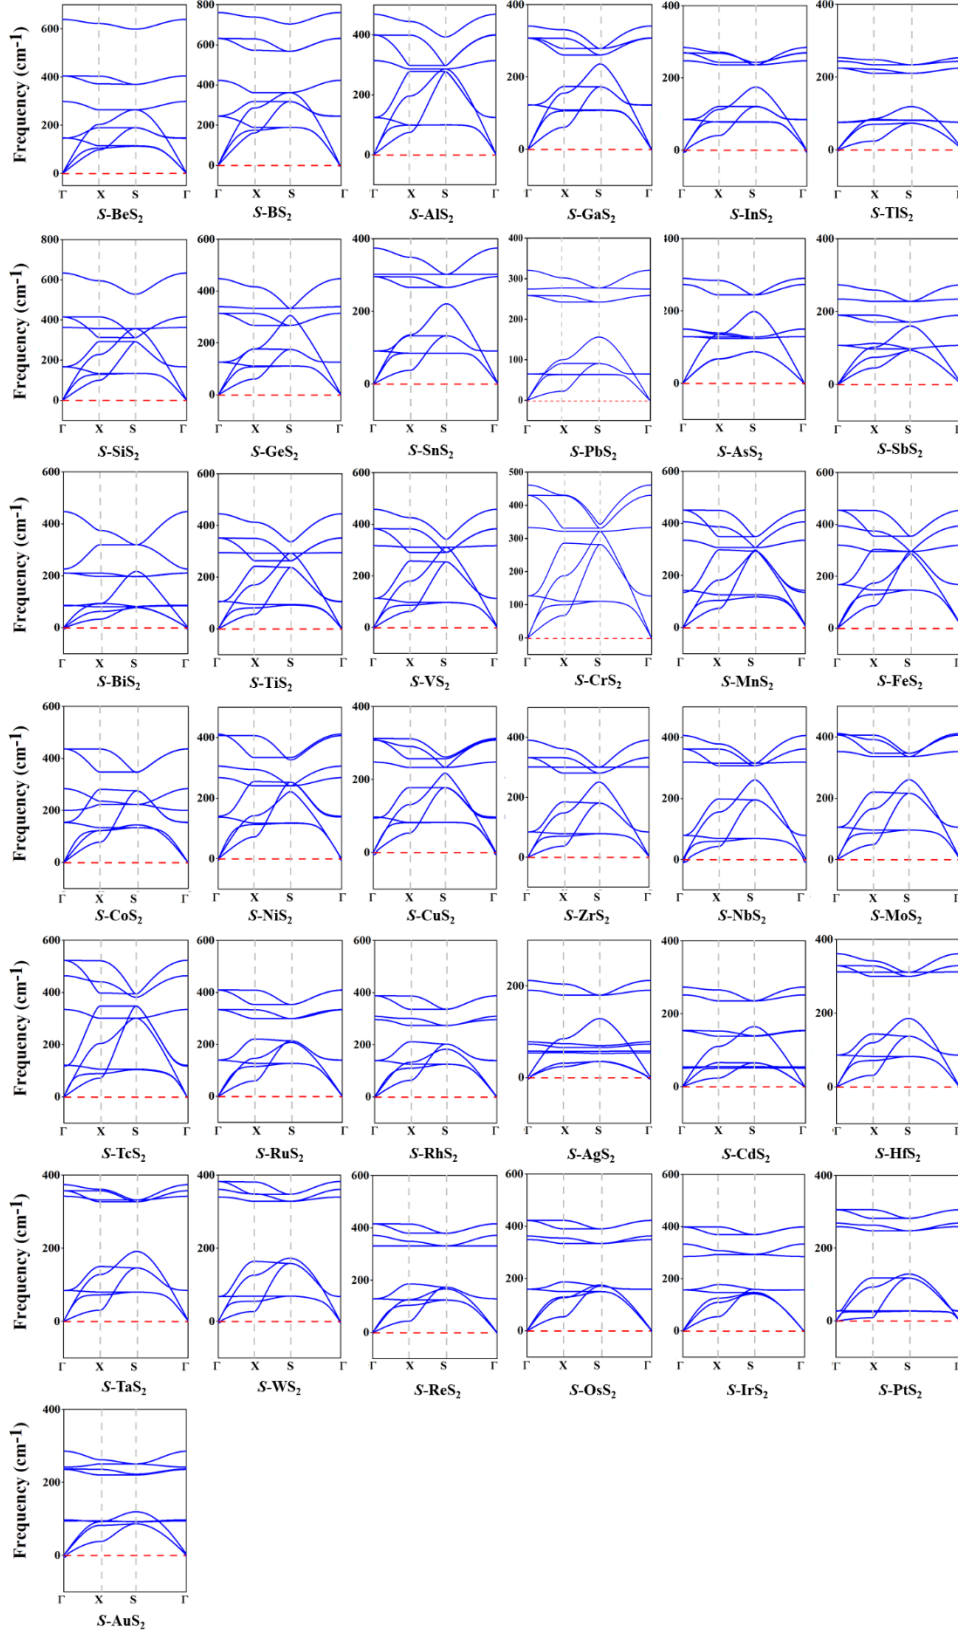

**Fig. S1** Calculated phonon dispersion curves of the 37 dynamically stable  $S$ - $XS_2$  monolayers.

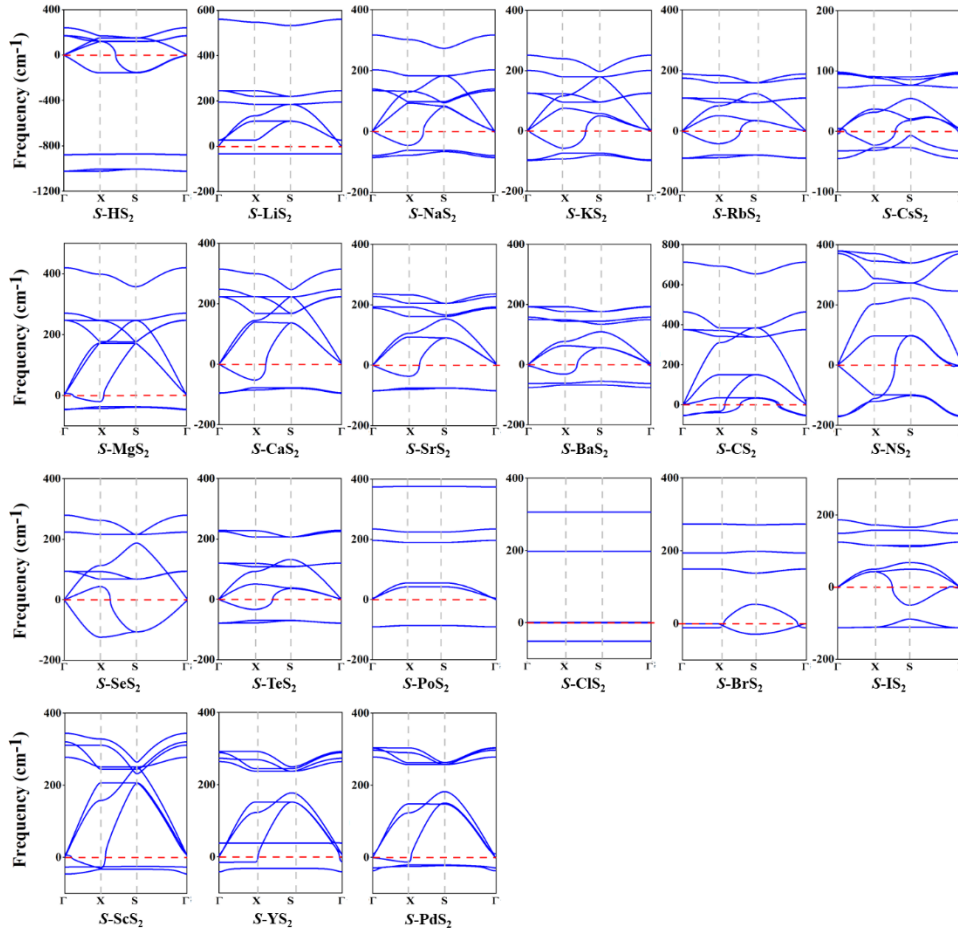

**Fig. S2** Calculated phonon dispersion curves of 21  $S$ - $X$  $S_2$  monolayers with significant imaginary frequencies.

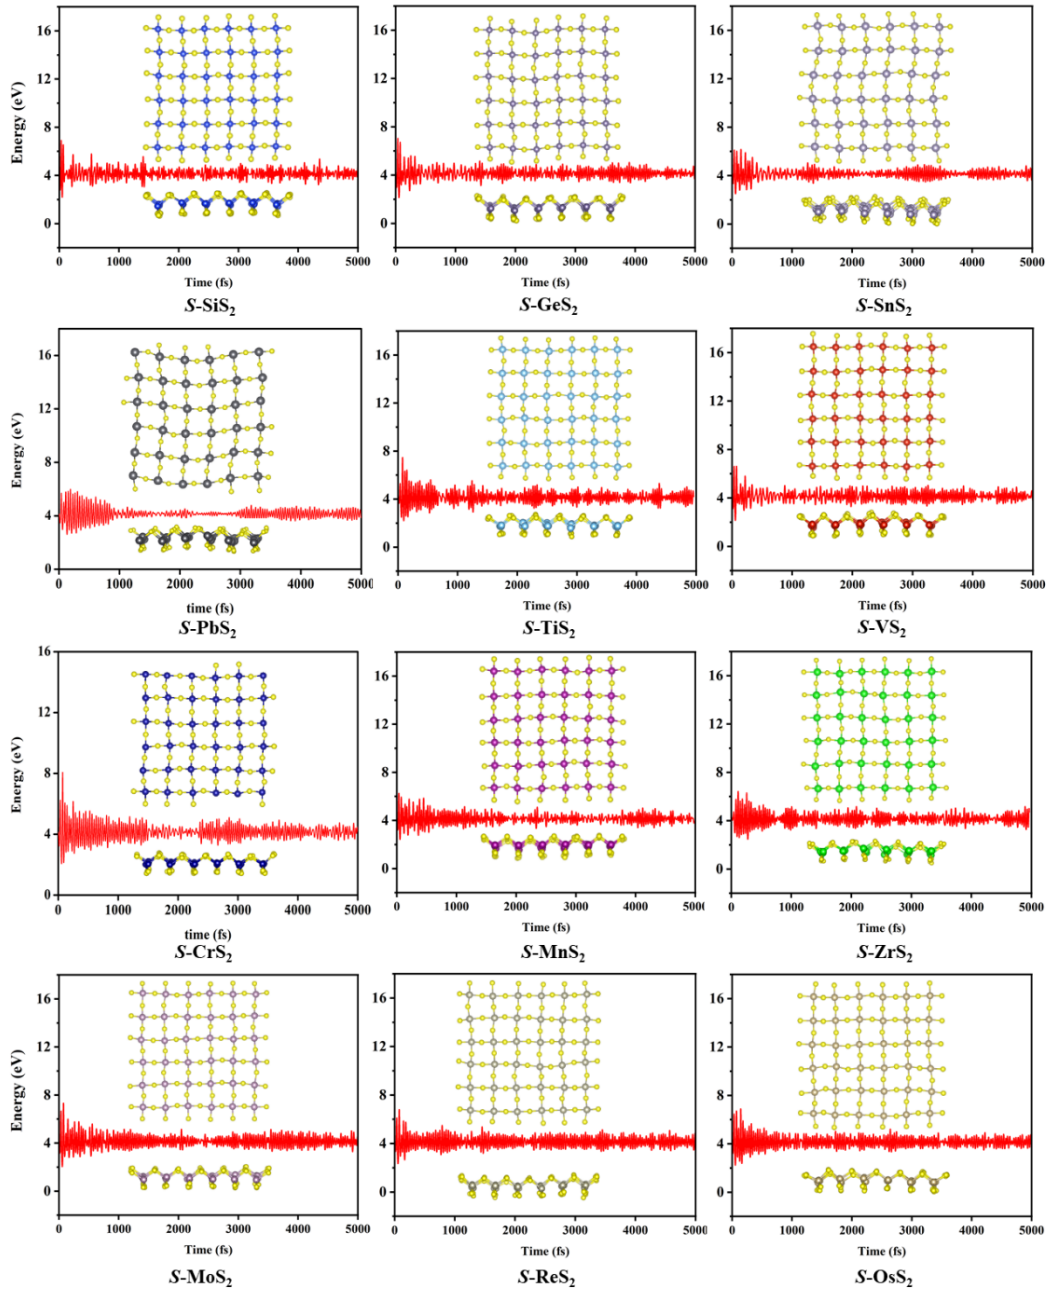

**Fig. S3** Final structure and energy fluctuation of 12 thermally stable  $S-XS_2$  monolayers upon 5 ps FPMD simulations at 300 K.

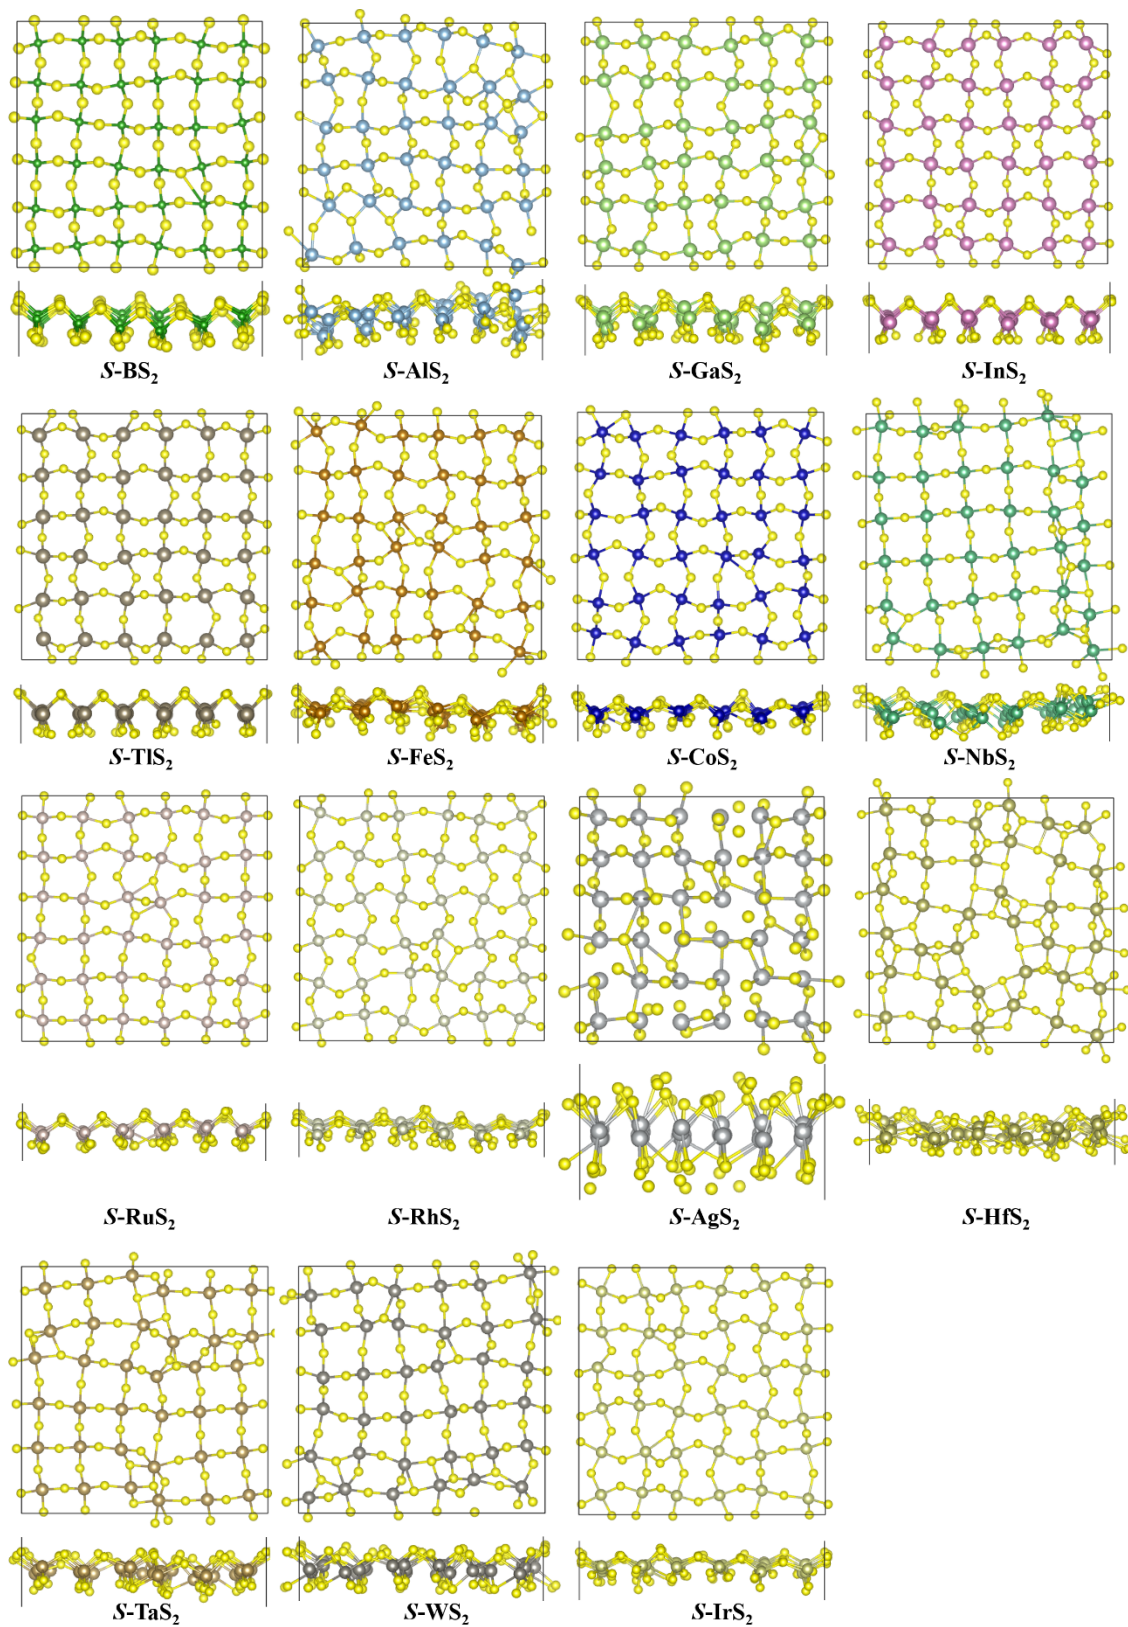

**Fig. S4** Final structures of 15 thermally unstable  $S\text{-XS}_2$  monolayers after 5 ps FPMD simulations at 300 K.

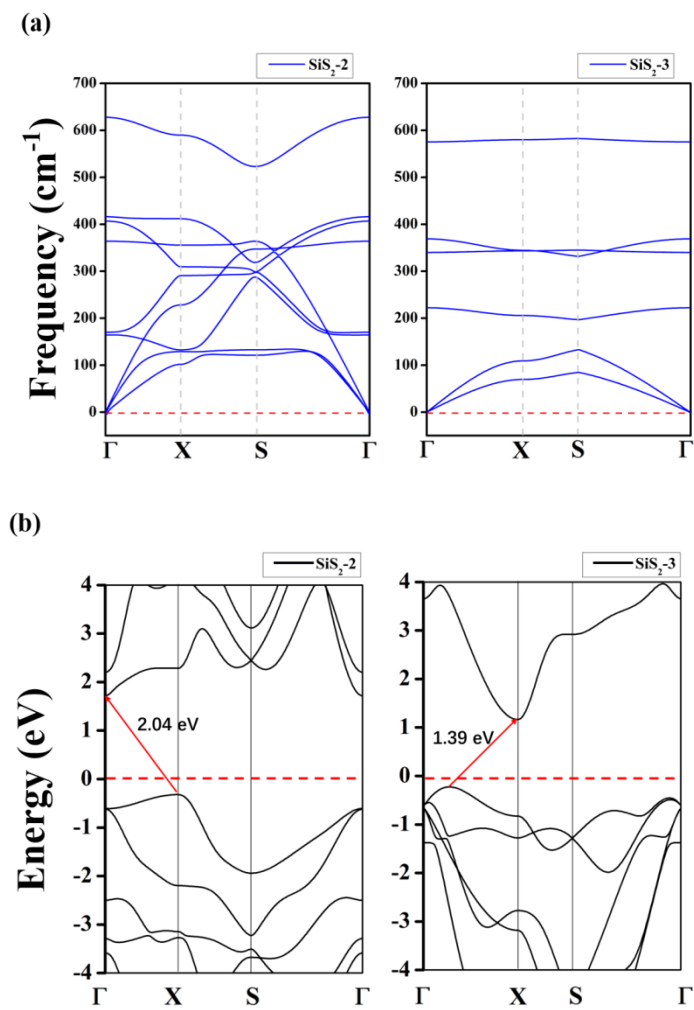

Fig. S5 (a) Phonon spectra and (b) band structures of  $\text{SiS}_2\text{-2}$  and  $\text{SiS}_2\text{-3}$ .

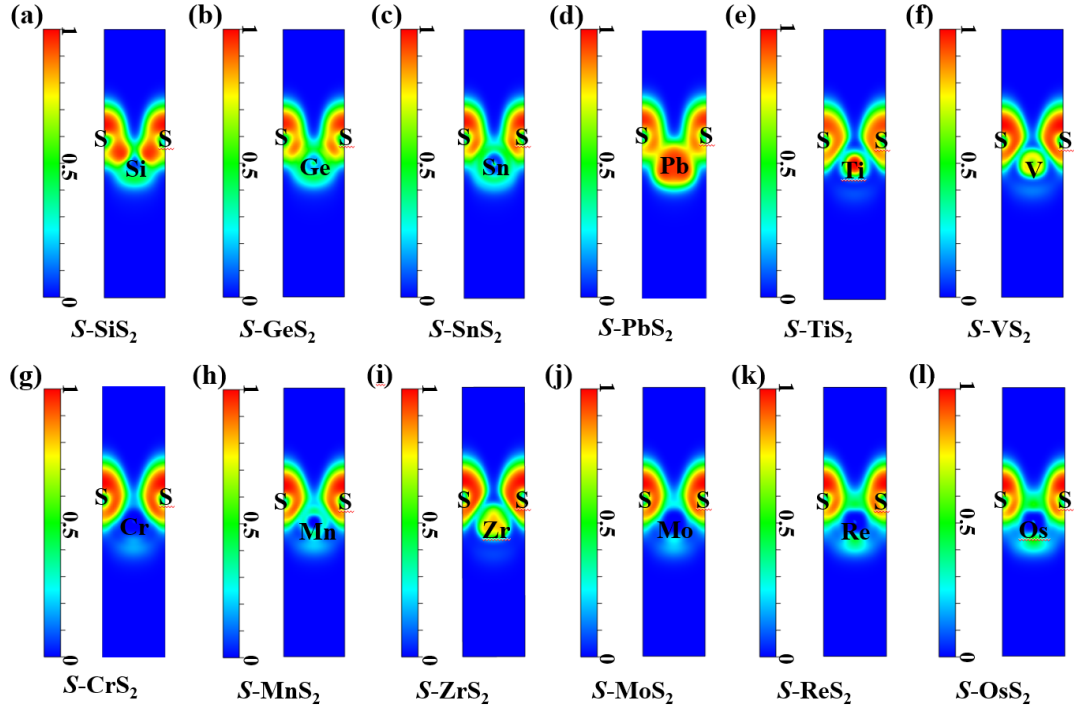

**Fig. S6** ELF maps of (010) slice for the square monolayer. ELF = 1 (red) and 0 (blue) indicate the accumulated and vanished electron densities, respectively. (a)  $S$ -SiS<sub>2</sub>, (b)  $S$ -GeS<sub>2</sub>, (c)  $S$ -SnS<sub>2</sub>, (d)  $S$ -PbS<sub>2</sub>, (e)  $S$ -TiS<sub>2</sub>, (f)  $S$ -VS<sub>2</sub>, (g)  $S$ -CrS<sub>2</sub>, (h)  $S$ -MnS<sub>2</sub>, (i)  $S$ -ZrS<sub>2</sub>, (j)  $S$ -MoS<sub>2</sub>, (k)  $S$ -ReS<sub>2</sub>, and (l)  $S$ -OsS<sub>2</sub>.

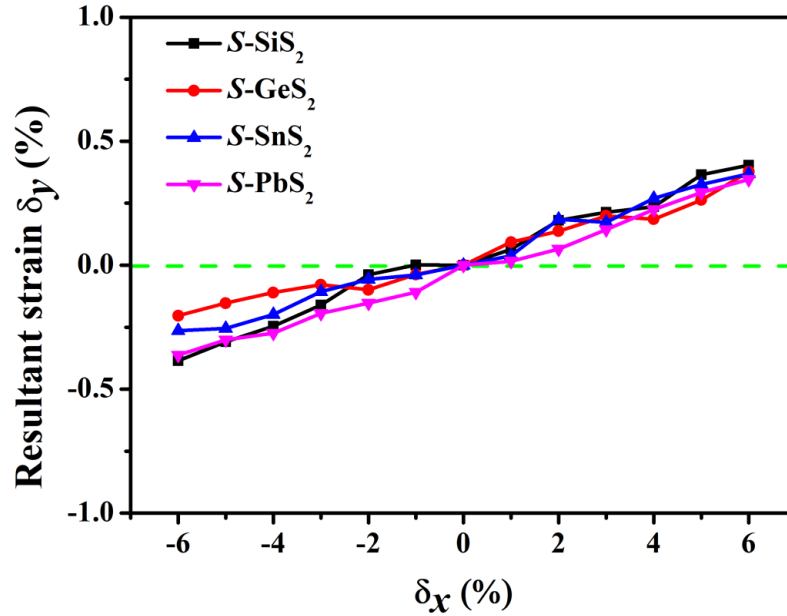

**Fig. S7** Mechanical response of the  $S$ -XS<sub>2</sub> ( $X = \text{Si, Ge, Sn, and Pb}$ ) monolayers under the uniaxial (ranging from  $-6\%$  to  $6\%$ ) strain along the  $x$ -direction.

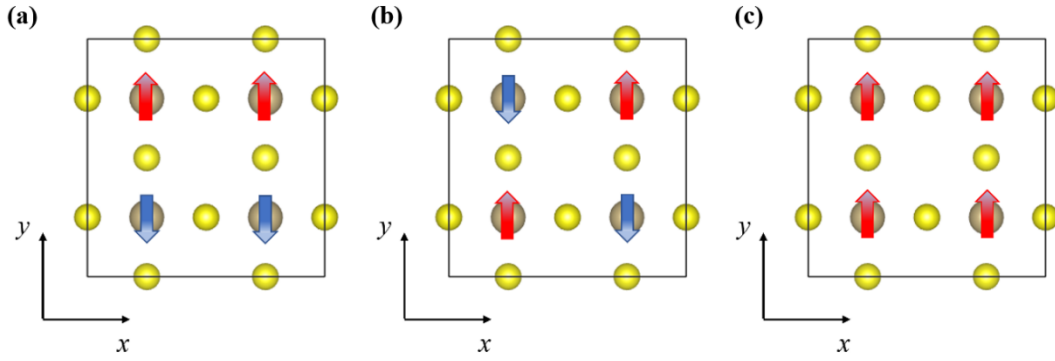

**Fig. S8** Schematic illustration of three different magnetic orders of  $S\text{-XS}_2$  monolayer. (a) AFM1. (b) AFM2. (c) FM.

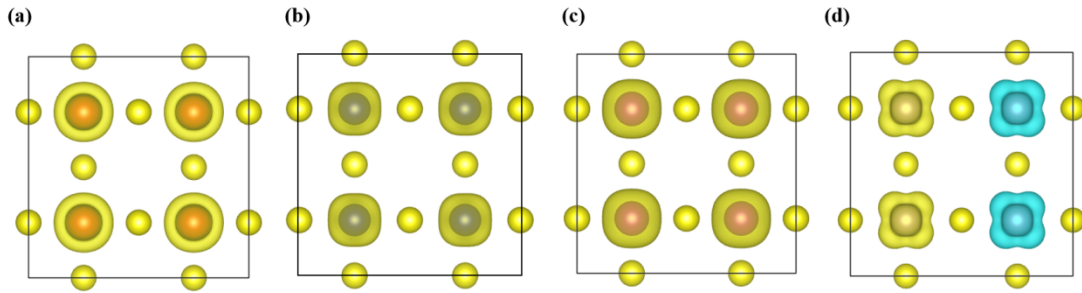

**Fig. S9** Magnetism distribution of metal atoms in  $S\text{-VS}_2$ ,  $S\text{-MnS}_2$  and  $S\text{-MoS}_2$  monolayers. The isosurface values were set as  $0.02 e \text{ \AA}^{-3}$ . (a) V atom in  $S\text{-VS}_2$  ( $1.39 \mu_B$ ) monolayer. (b) Cr atom in  $S\text{-VS}_2$  ( $2.91 \mu_B$ ) monolayer. (c) Mn atom in  $S\text{-MnS}_2$  ( $3.28 \mu_B$ ) monolayer. (d) Mo atom in  $S\text{-MoS}_2$  ( $\pm 1.46 \mu_B$ ) monolayer.

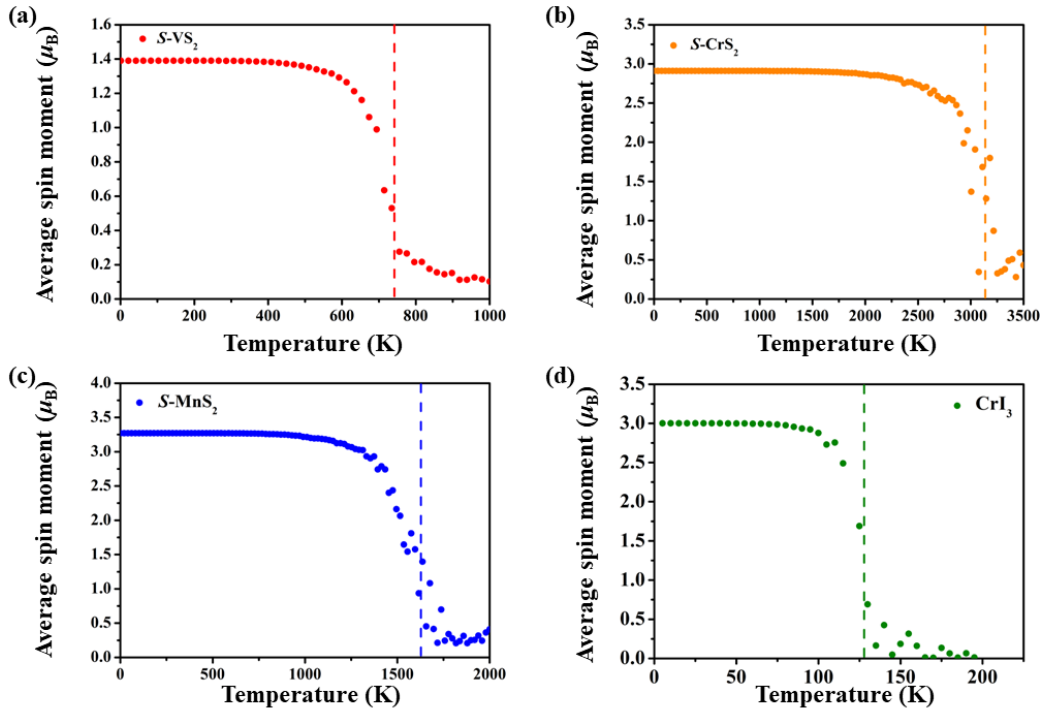

**Fig. S10** On-site magnetic moments of transition metal atoms as a function of temperature from MC simulations. (a)  $S$ - $VS_2$ . (b)  $S$ - $CrS_2$ . (c)  $S$ - $MnS_2$ . (d)  $CrI_3$ .

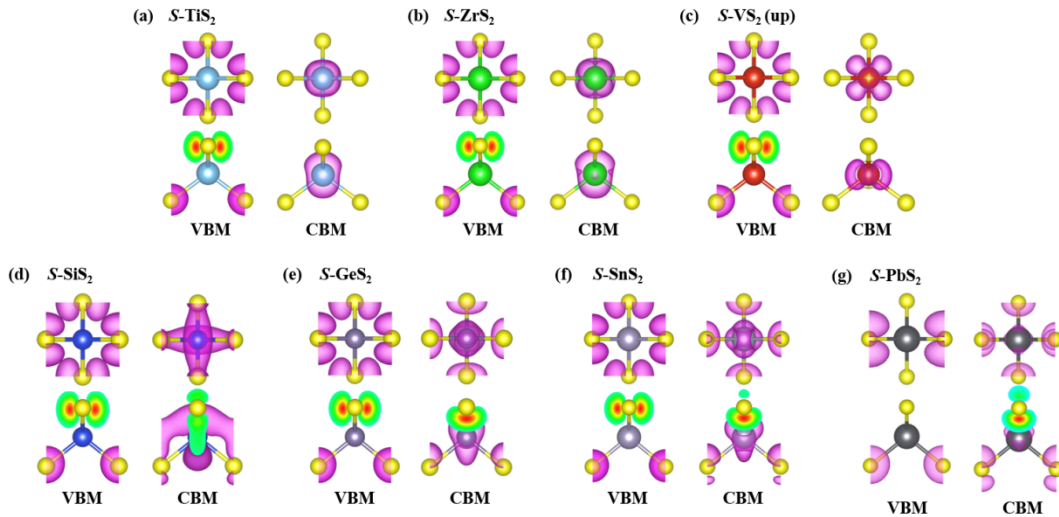

**Fig. S11** Partial charge distribution of VBM and CBM of  $S$ - $XS_2$  monolayers. (a)  $S$ - $TiS_2$ . (b)  $S$ - $ZrS_2$ . (c)  $S$ - $VS_2$  (spin-up channel). (d)  $S$ - $SiS_2$ . (e)  $S$ - $GeS_2$ . (f)  $S$ - $SnS_2$ . (g)  $S$ - $PbS_2$ . The isosurface values were set as  $0.01 \text{ e } \text{\AA}^{-3}$ .



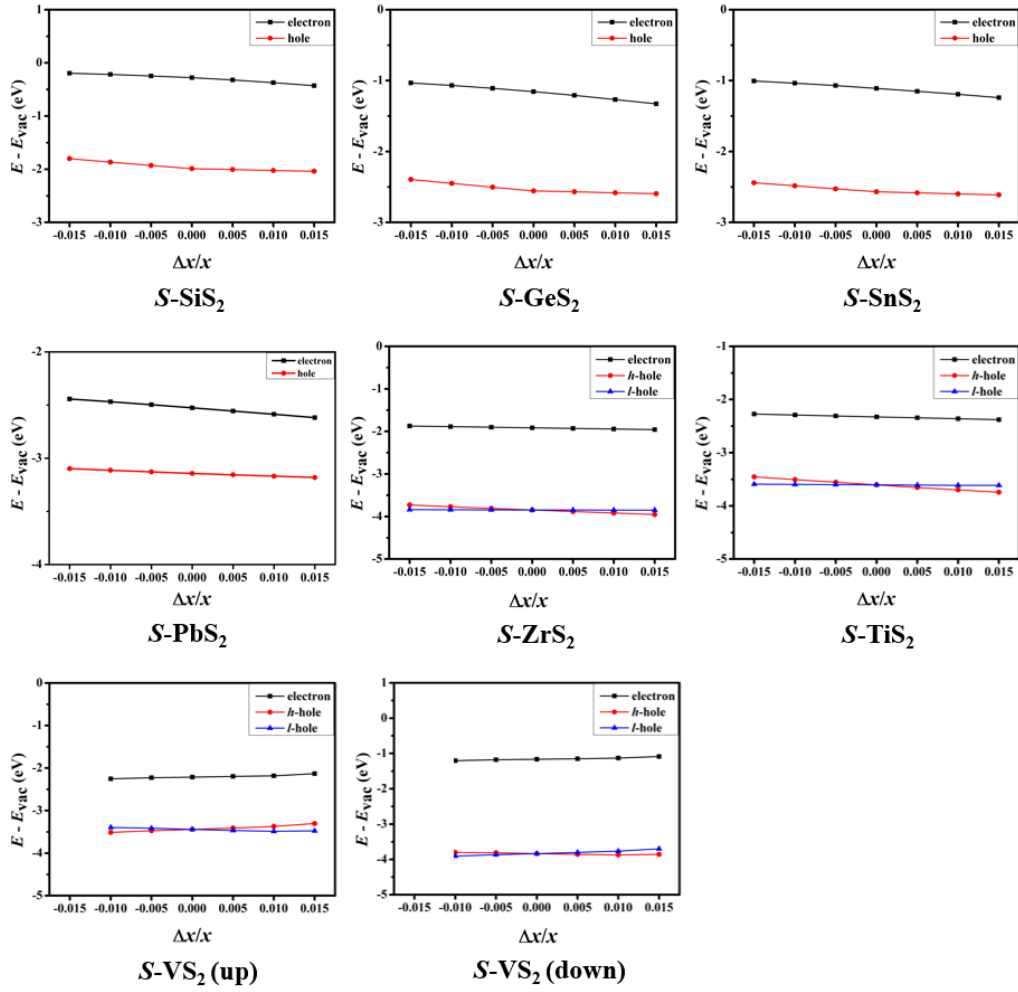

**Fig. S12** Fitting curves of deformation potentials of  $S$ - $XS_2$  ( $X = \text{Si, Ge, Sn, Pb, Zr, Ti,}$  and  $V$  (spin-up and spin-down)) monolayers. The strain ( $\Delta x/x$ ) is ranging from  $-0.015$  to  $0.015$  with the steps of  $0.005$ .

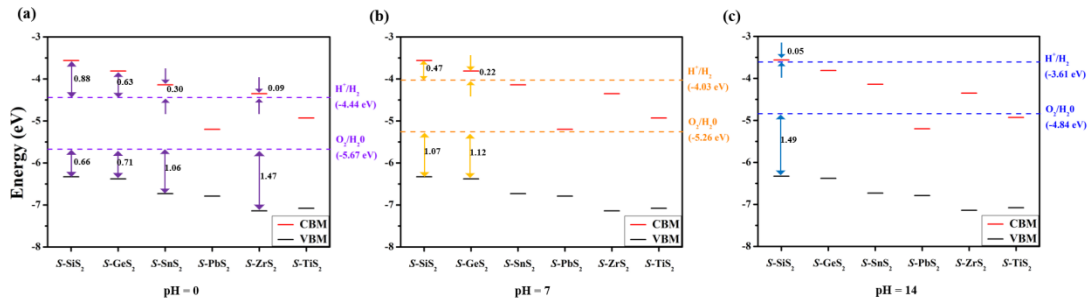

**Fig. S13** CBM and VBM energies of  $S$ - $XS_2$  ( $X = \text{Si, Ge, Sn, Pb, Zr, and Ti}$ ) monolayers. Redox potentials of water splitting at (a)  $\text{pH} = 0$  (purple dashed lines), (b)  $\text{pH} = 7$  (orange dashed lines), and (c)  $\text{pH} = 14$  (blue dashed lines).

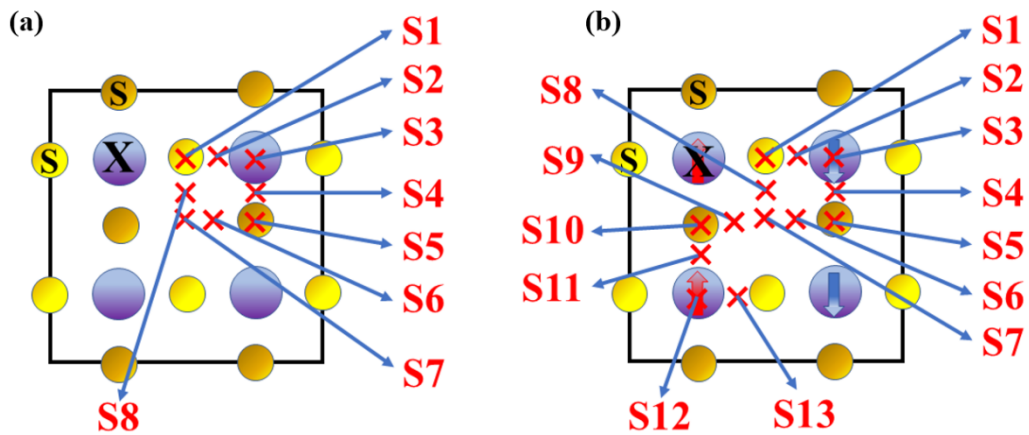

**Fig. S14** (a) Possible H adsorption sites on the nonmagnetic (NM)  $S$ - $\text{ReS}_2$ ,  $S$ - $\text{OsS}_2$  and ferromagnetic (FM)  $S$ - $\text{MnS}_2$  monolayers with a  $2 \times 2 \times 1$  supercell. (b) Possible H adsorption sites on the antiferromagnetic (AFM1)  $S$ - $\text{MoS}_2$  monolayer, the red/blue arrow indicate the spin up/down magnetic configuration of Mo. Purple and dark/light yellow balls represent the X and S atoms of bottom/top layer, respectively.

(a) 1/4 H coverage

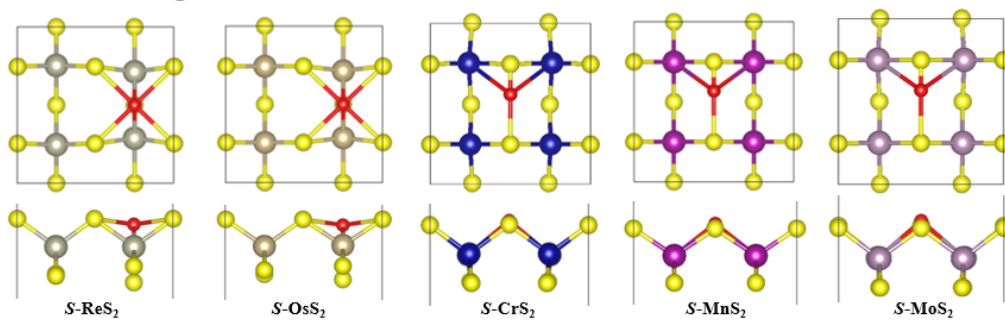

(b) 1/9 H coverage

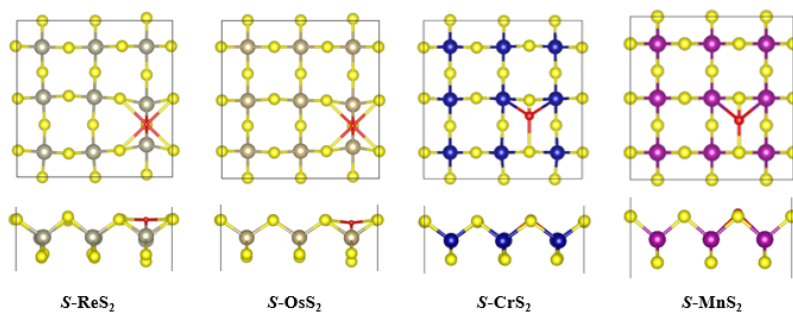

(c) 1/16 H coverage

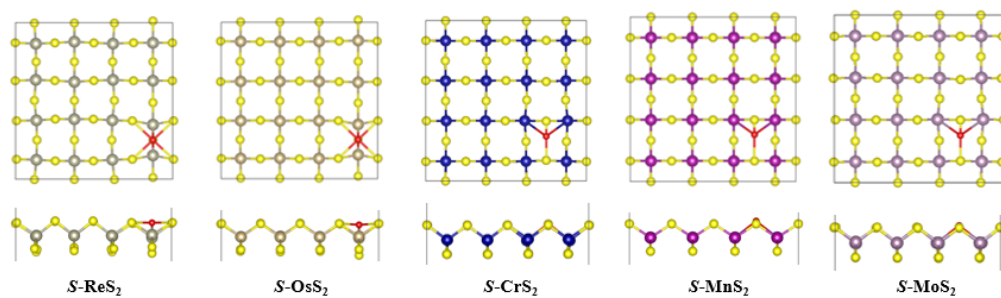

**Fig. S15** Optimized structures of the energetically most favorable H adsorption sites on the  $S\text{-XS}_2$  ( $X = \text{Re, Os, Cr, Mo, and Mn}$ ) monolayer with H coverage of (a) 1/4, (b) 1/9 and (c) 1/16.
